# Supplementary material for: Effects of Peatland Management on Aquatic Carbon Concentrations and Fluxes
Source: Copernicus journal article supplement (doi:10.5194/bg-2021-65), 2021-05-05
Supplement: Supplementary file [file bg-2021-65-AC3-supplement.pdf]

**CC1 Comment**

Really nice study! Congratulate the authors on such a neat design and presentation of the findings.

I would like to suggest the authors include a clarification in the title as to the type of management. Only too often are papers quoted in relation to management (generic) whilst the actual study focused on one issue (drainage). So here it is addressing past afforestation (and drainage!) on peatlands.

**Author reply**

Many thanks for your positive comments.

Based on your feedback we can adjust the paper title to the following, if acceptable to the journal to change at point of review: "Effects of Peatland Drainage and Restoration on Aquatic Carbon Concentrations and Fluxes"
