# Supplementary material for: Effects of Peatland Management on Aquatic Carbon Concentrations and Fluxes
Source: Copernicus journal article supplement (doi:10.5194/bg-2021-65), 2021-05-05
Supplement: Supplementary file [file bg-2021-65-AC5-supplement.pdf]

*Reviewer comment in italics*

Author response in plain text

## **RC2 Comment**

*The manuscript of Pickard et al. focuses on the fluvial carbon export from disturbed and restored wetlands. As this carbon flux is a substantial factor in the carbon balance, they monitored dissolved organic and inorganic carbon as well as CO<sub>2</sub> and CH<sub>4</sub> in peatland draining streams over a two year period. The manuscript is well written and the generated data set is worth to be published. However, the presented study shows some major limitations, which has been addressed before in a pre-review and were not considered in a minor manuscript revision by the authors beforehand. Major concerns still are: 1) unclear way of calculation of carbon fluxes on all six monitoring sites, when only three were equipped with pressure transducer for water level recording; 2) reliability and clarity of the DIC and CO<sub>2</sub> data 3) lack of data discussion and scientific hypotheses. These major points will be further addressed below. Especially point 2) raises my concerns and needs to be edited properly.*

Thank you for your comments – these have helped us to improve the manuscript.

*1) The description of p8 L151-156 is still not entirely clear to me. Do you conducted discharge measuring by dilution experiments on all six sites and correlated it to the three stage measurements? This will give you an error in the flux and FWM concentration data, which should be addressed somewhere.*

Yes, we conducted dilution experiments at all six sites, and produced correlations to the three sub-catchments with monitored water level. To show the process more clearly in line with the reviewer's comment, we have added the stage dilutions and resultant correlations to a supplementary information file. We also add further text to the discussion on the uncertainty that can be introduced through this method, although we are of the view that the stage correlations between sites are robust given that they produced fits of  $r^2 > 0.84$  for all sub catchments.

*2) I can just repeat former questions and comments. If I understand correctly, DIC has been measured along with the DOC concentrations on filtered samples, which were stored up to 4 weeks! During this handling and storage, a lot happens to DIC, which is in equilibrium with CO<sub>2</sub> in the atmosphere. Changes in pH, outgassing of CO<sub>2</sub> and production in a non-sterile sample is most likely. I do not think that this kind of data meets scientific quality standards. Coming to measured CO<sub>2</sub> concentrations, a dependency of CO<sub>2</sub> speciation on pH in water samples is completely neglected. You state that you measured pH at each sampling. Why don't you use this information? Even more unclear to me is why you separate these two parameters, as normally CO<sub>2</sub> (as calculated by Henrys Law) in solution is a major part of DIC under low pH (as this is probably the case in these catchments). Having pH and CO<sub>2</sub> concentrations you can also calculate the entire DIC in the water sample. This might be more correct than the DIC measurements or could be used for validation. Additionally, in the results part these two measured parameters - CO<sub>2</sub> and DIC - were summed up in the carbon export calculations. This is simply not correct as you double the CO<sub>2</sub> contribution then. In the end, I don't see any sense in comparing CO<sub>2</sub> concentrations at different sites when the pH is not considered.*

Carbon dioxide determination following the headspace method is a routine technique and it has recently been proven that for samples with low pH (<7.5, as is the case for headwaters draining peatland catchments) providing no correction for pH/alkalinity produces errors < 5% (Koschorreck et al., 2021). We have added this reference, and the associated quoted uncertainty, to the manuscript. It is in high pH samples where this issue becomes significant. We do not have alkalinity or pH data to

make this correction in any case. We have removed reference to pH sampling from the manuscript, as whilst these data were collected during sampling they are not available to us for use in the interpretation.

In regard to the separate analysis of DIC and CO<sub>2</sub>, our rationale remains that we think it is of interest to measure these separately as dissolved CO<sub>2</sub> data are important for the potential evasion of carbon directly from headwater streams to the atmosphere, with clear implications for GHG budgets (and our data suggest that CO<sub>2</sub> is outgassed quickly, as indicated by the inverse relationship with catchment area drained – an important finding of the study). However, we take the reviewer's comments on board with regard to CO<sub>2</sub> being a part of the total DIC budget, and have now decided to present CO<sub>2</sub> data only. This hopefully also addresses the data quality concerns raised by the reviewer regarding the DIC data.

*3) There are some shortcomings in the scientific significance. The study presents a good data set, but is mainly descriptive and clear conclusions or benefits from the study are not well stressed. No hypotheses raised.*

We do not pose hypotheses, but we have introduced research questions at the end of the introduction which we aim to answer in the discussion. We believe that this is equally valid approach to hypothesis testing.

In terms of the scientific significance, we think that this data set clearly show the dramatic effect that drainage still has on aquatic peatland carbon losses even 50 years after ploughing of an undisturbed site. Restoration as a land use intervention inevitably leads to disturbance and a high degree of catchment spatial variability in terms of water and carbon flow, and our data show this to be the case. Noisy biogeochemical signals suggest that peatlands needs time to reset and reach a new equilibrium. We have added further emphasis on these points to the discussion to make this message clearer. We add other information on the scientific significance of the study from a carbon speciation perspective in the comment below.

*The relevance of different carbon species is not explained in the Introduction. Therefore, the research question how different carbon species vary and why it is important to measure them is not introduced. Moreover, the importance of DOC is highlighted before.*

One of the key outputs of this study is the carbon speciation data provided. We have added further information on the importance of each species to the introduction, namely that whilst DOC is typically the largest export term, POC can indicate erosional increases that can often be traced back to different land uses (i.e. drained peatland sites might be expected to have higher POC concentrations, and in some severely drained peatlands this can become the dominant C species contributing to total fluvial carbon losses), and dissolved CO<sub>2</sub> and CH<sub>4</sub> have direct relevance for the GHG budgets of the streams themselves, as these gases are quickly evaded from solution to the atmosphere. Indeed, the consistent finding that dissolved gaseous GHG concentrations were higher in the smaller catchments is one of the interesting findings of this study – and to our knowledge, the first data of this kind collected in the Flow Country's headwater streams. In the revised manuscript we add previously unused nitrous oxide data to provide the full suite of dissolved GHGs. We hope that the additional text make the message about the importance of dissolved GHGs evading from peatland headwaters clearer, as this is a key finding.

*The discussion needs improvement and mainly cites literature from the UK. Maybe it would be helpful to additionally compare the study to international studies on rather natural sites, where more literature can be found? Another helpful publication might be: Swenson et al. 2019: Carbon balance*

*of a restored and cutover raised bog: implications for restoration and comparison to global trends, Biogeosciences 16 (3), p 713–731 DOI: 10.5194/bg-16-713-2019*

As we stated in response to reviewer 1, we have added a number of further references to the discussion to widen the scope beyond UK based references (e.g. Haapalehto et al., 2014; Menberu et al., 2017; Strack et al., 2015). Thank you also for the further paper suggestion – this has also been added.

*At last I would like to read some statements why it is reasonable to compare different carbon concentrations? As you cannot draw conclusions on the carbon balance or losses from the peatland it is probably because of water quality issues? What conclusions can be drawn from it?*

As we state above: “whilst DOC is typically the largest export term, POC can indicate erosional increases that can often be traced back to different land uses (i.e. drained peatland sites might be expected to have higher POC concentrations, and in some severely drained peatlands this can become the dominant C species contributing to total fluvial carbon losses ), and dissolved CO<sub>2</sub> and CH<sub>4</sub> have direct relevance for the GHG budgets of the streams themselves, as these gases are quickly evaded from solution to the atmosphere. Indeed, the consistent finding that dissolved gaseous GHG concentrations were higher in the smaller catchments is one of the interesting and novel findings of this study”.

*Some specific comments: Fig 2. Tab. 2 and Fig 3 show all more or less the same data. Maybe you can reduce redundancy. The same goes for Table 5 and Figure 6.*

We disagree that Figures 2 and 3 show the same data as the boxplots give no indication of the temporal variation between the carbon species, and we think this is useful for the paper’s readers to see. We have removed Figure 6 as it does show the same information as Table 5.

*P7 L 135-136: I am confused by the phrase “...affected by artificial drainage alone,...” I am no native speaker. Does this mean that that the non-drained catchments formerly has been drained and are additionally affected by other disturbances? Maybe you can clarify/rephrase this.*

It is meant to indicate that some sites have been artificially drained, whereas other sites have been artificially drained and afforested. We have amended the text to clarify this.

*P12, L214ff: As CO<sub>2</sub> concentrations are greatly dependent on pH this should be considered here. Moreover, it would be nice to state if the water is supersaturated and outgassing prevails?*

As stated in another comment, we have now removed all reference to pH from the manuscript as we do not have the data available for interpretation.

*P 13 L233: link to “Figure 5” seems to be wrong*

This has been corrected.

*P 19 L302ff: “... with the second most important export component DIC followed by CO<sub>2</sub>” This makes no sense.*

As mentioned, we have now removed reference to DIC from the paper.

*P23 L414: see comment above*

See above.

## References

Haapalehto, T., Kotiaho, J.S., Matilainen, R., Tahvanainen, T., 2014. The effects of long-term drainage and subsequent restoration on water table level and pore water chemistry in boreal peatlands. *J. Hydrol.* <https://doi.org/10.1016/j.jhydrol.2014.09.013>

Koschorreck, M., Prairie, Y. T., Kim, J., and Marcé, R.: Technical note: CO<sub>2</sub> is not like CH<sub>4</sub> – limits of and corrections to the headspace method to analyse pCO<sub>2</sub> in fresh water, *Biogeosciences*, 18, 1619–1627, <https://doi.org/10.5194/bg-18-1619-2021>, 2021.

Menberu, M.W., Marttila, H., Tahvanainen, T., Kotiaho, J.S., Hokkanen, R., Kløve, B., Ronkanen, A.K., 2017. Changes in Pore Water Quality After Peatland Restoration: Assessment of a Large-Scale, Replicated Before-After-Control-Impact Study in Finland. *Water Resour. Res.* <https://doi.org/10.1002/2017WR020630>

Strack, M., Zuback, Y., McCarter, C., Price, J., 2015. Changes in dissolved organic carbon quality in soils and discharge 10 years after peatland restoration. *J. Hydrol.* <https://doi.org/10.1016/j.jhydrol.2015.04.061>
